# Supplementary material for: Role of composition and texture on bifunctional catalytic performance of extruded Au–Cu alloys
Source: Royal Society of Chemistry journal article supplement (doi:10.1039/d2ra03438g), 2022-01-01
Supplement: d2ra03438g1.pdf [file d2ra03438g1.pdf]

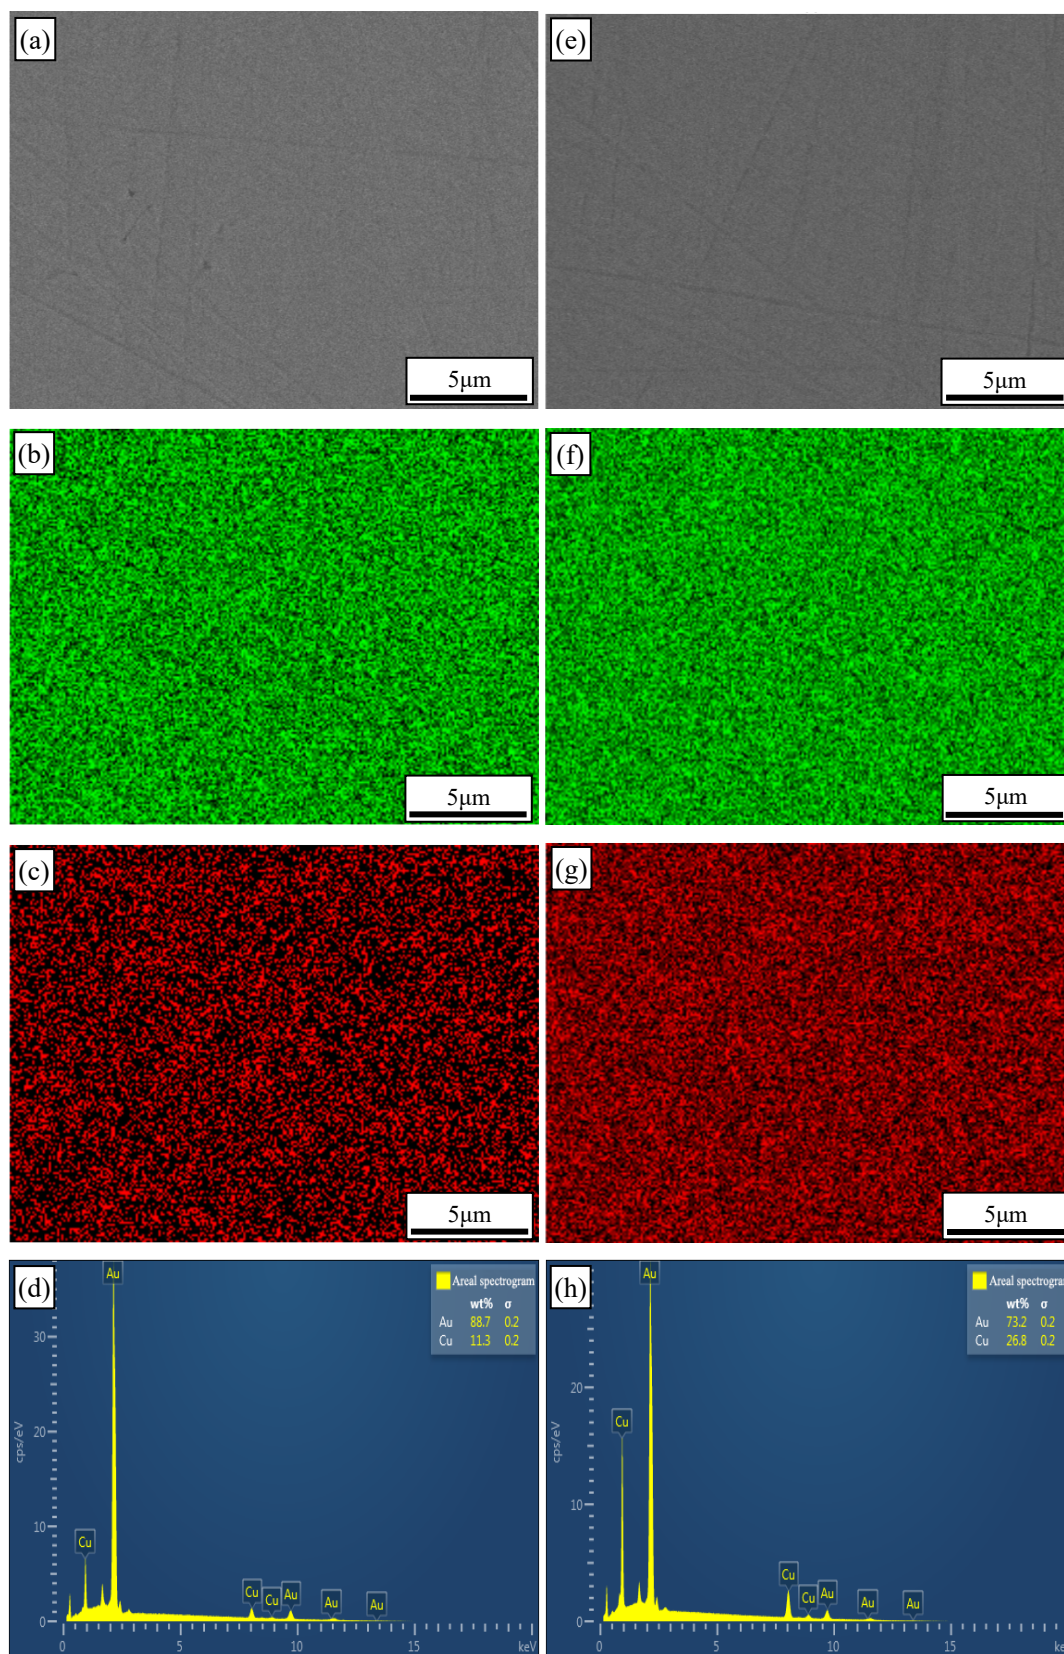

**Fig.S1** (a) SEM images together with (b) Au element distribution, (c) Cu element distribution and (d) EDS analysis for Au<sub>2</sub>Cu sample. (e) SEM images together with (f) Au element distribution, (g) Cu element distribution and (h) EDS analysis for AuCu sample

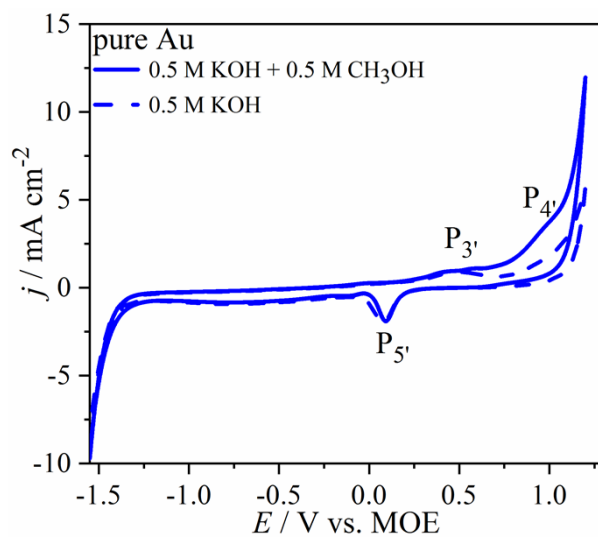

**Fig.S2** Cyclic voltammogram (CV) of pure Au in 0.5 M KOH + 0.5 M CH<sub>3</sub>OH solution. The dash line is the CV curve in 0.5 M KOH solution. Scan rate  $\nu$ : 50 mV/s

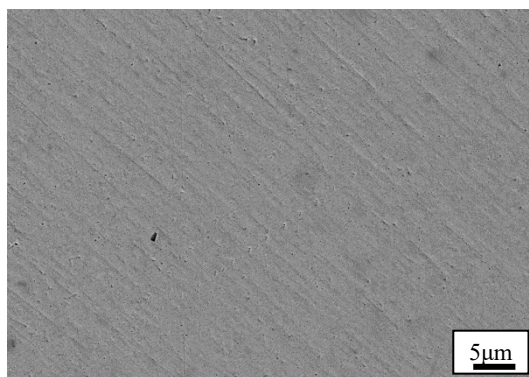

**Fig.S3** SEM image of pure Au after CV test in 0.5 M KOH + 0.5 M CH<sub>3</sub>OH solution

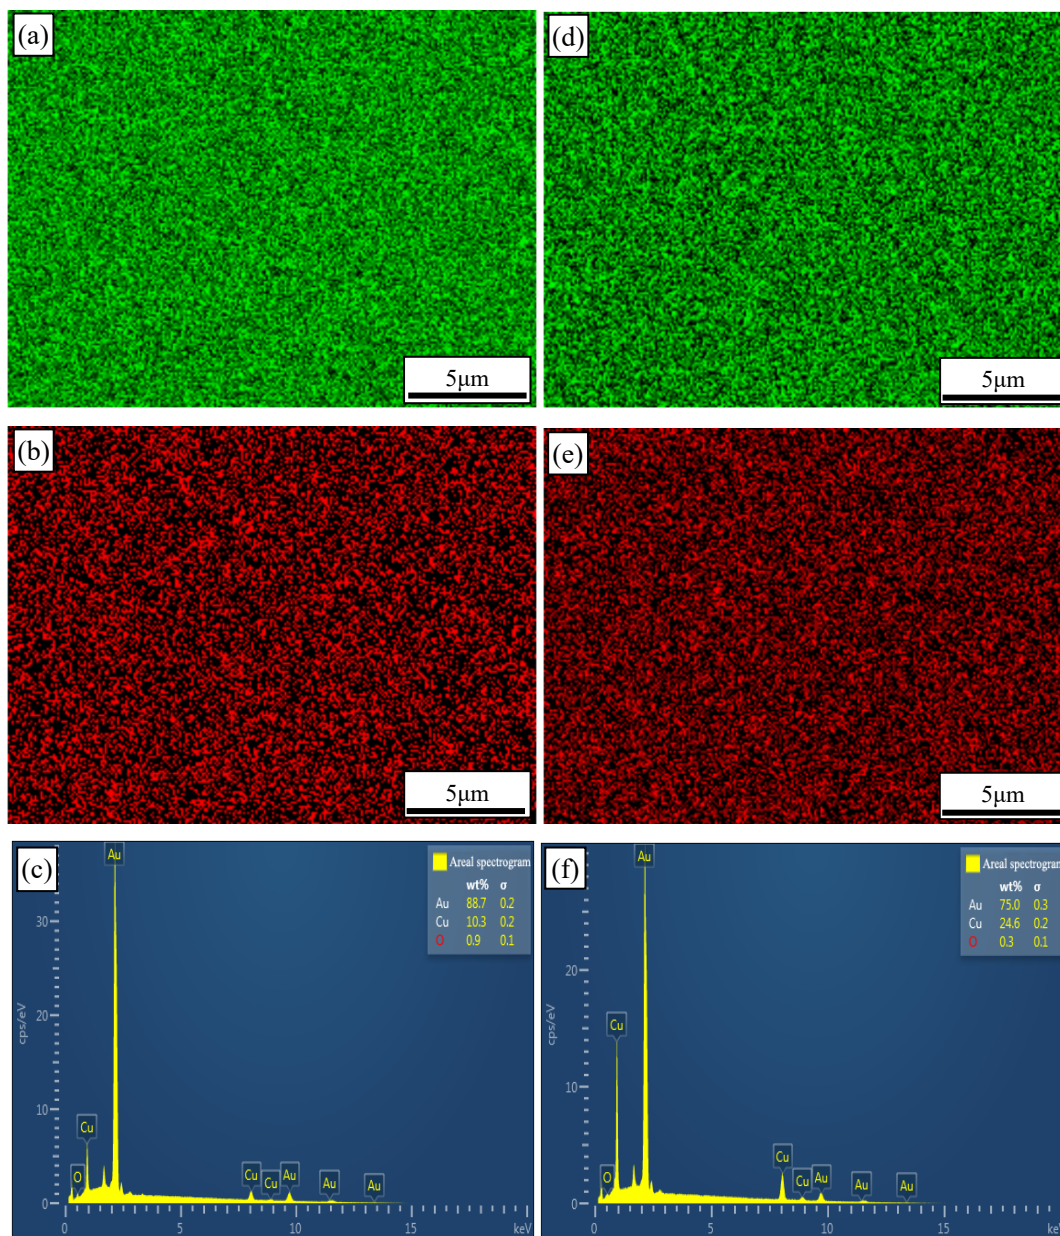

**Fig.S4** (a) Au element distribution, (b) Cu element distribution and (c) EDS analysis for Au<sub>2</sub>Cu sample surface after CV test in 0.5 M KOH + 0.5 M CH<sub>3</sub>OH solution. (d) Au element distribution, (e) Cu element distribution and (f) EDS analysis for AuCu sample surface after CV test in 0.5 M KOH + 0.5 M CH<sub>3</sub>OH solution

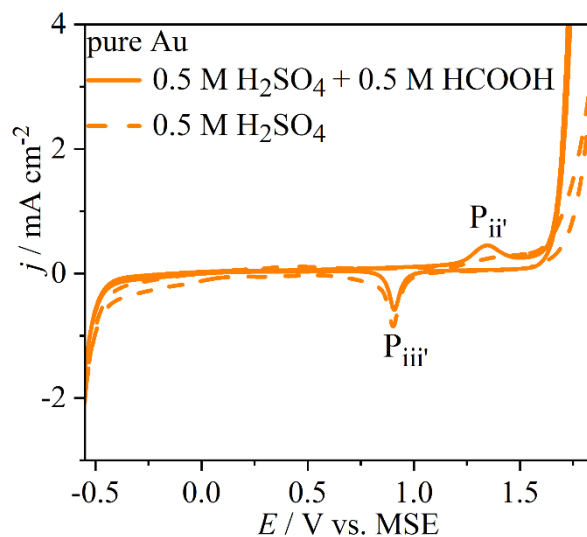

**Fig.S5** Cyclic voltammogram (CV) of pure Au in 0.5 M H<sub>2</sub>SO<sub>4</sub> + 0.5 M HCOOH solution. The dash line is the CV curve in 0.5 M H<sub>2</sub>SO<sub>4</sub> solution. Scan rate  $v$ : 50 mV/s

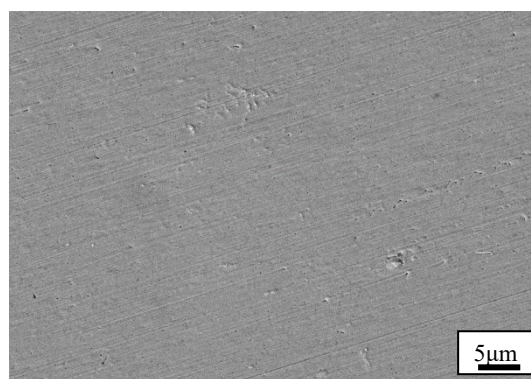

**Fig.S6** SEM image of pure Au after CV test in 0.5 M H<sub>2</sub>SO<sub>4</sub> + 0.5 M HCOOH solution

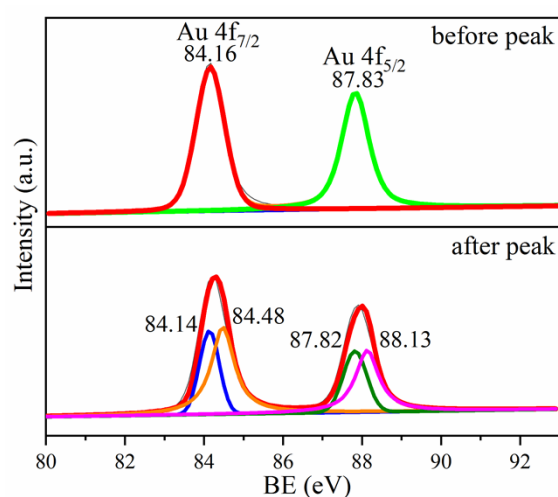

**Fig.S7** XPS spectra of sample surfaces with pure Au before and after the anodic peak P<sub>3</sub> of CV curves tested in 0.5 M KOH + 0.5 M CH<sub>3</sub>OH solution
